# Supplementary material for: Metabolic control of histone acetylation for precise and timely regulation of minor ZGA in early mammalian embryos
Source: PubMed Central journal article supplement (PMC9515074; doi:10.1038/s41421-022-00440-z), 2022-09-27
Supplement: 41421_2022_440_MOESM1_ESM.pdf [file 41421_2022_440_MOESM1_ESM.pdf]

## **Metabolic control of histone acetylation for precise and timely regulation of minor ZGA in early mammalian embryos**

Jingyu Li,<sup>2,8</sup> Jiaming Zhang,<sup>1,7,8</sup> Weibo Hou,<sup>1,7,8</sup> Xu Yang,<sup>1</sup> Xiaoyu Liu,<sup>3</sup> Yan Zhang,<sup>4</sup> Meiling Gao,<sup>4</sup> Ming Zong,<sup>1,7</sup> Zhixiong Dong,<sup>1</sup> Zhonghua Liu,<sup>7</sup> Jingling Shen,<sup>5</sup> Weitao Cong,<sup>6</sup> Chunming Ding,<sup>1</sup> Shaorong Gao,<sup>3,\*</sup> Guoning Huang,<sup>2,\*</sup> and Qingran Kong<sup>1,\*</sup>

<sup>1</sup>School of Laboratory Medicine and Life Sciences, Wenzhou Medical University, Wenzhou, Zhejiang Province, China

<sup>2</sup>Chongqing Key Laboratory of Human Embryo Engineering, Center for Reproductive Medicine, Women and Children's Hospital of Chongqing Medical University, Chongqing, China

<sup>3</sup>Frontier Science Center for Stem Cell Research, School of Life Sciences and Technology, Tongji University, Shanghai, 200092, China

<sup>4</sup>School of Optometry and Ophthalmology and Eye Hospital, Wenzhou Medical University, Wenzhou, Zhejiang, China

<sup>5</sup>Institute of Life Sciences, Wenzhou University, Wenzhou, Zhejiang, China

<sup>6</sup>School of Pharmaceutical Science, Wenzhou Medical University, Wenzhou, P.R. China.

<sup>7</sup>College of Life Science, Northeast Agricultural University, Harbin, Heilongjiang, China

<sup>8</sup>These authors contributed equally

\*Correspondence: gaoshaorong@tongji.edu.cn (S.G.), gnhuang217@sina.com (N.G.), kqr721726@163.com (Q.K.)

Supplementary Information:

Supplementary Figs. S1-7

Supplementary Tables S1-6

**a**

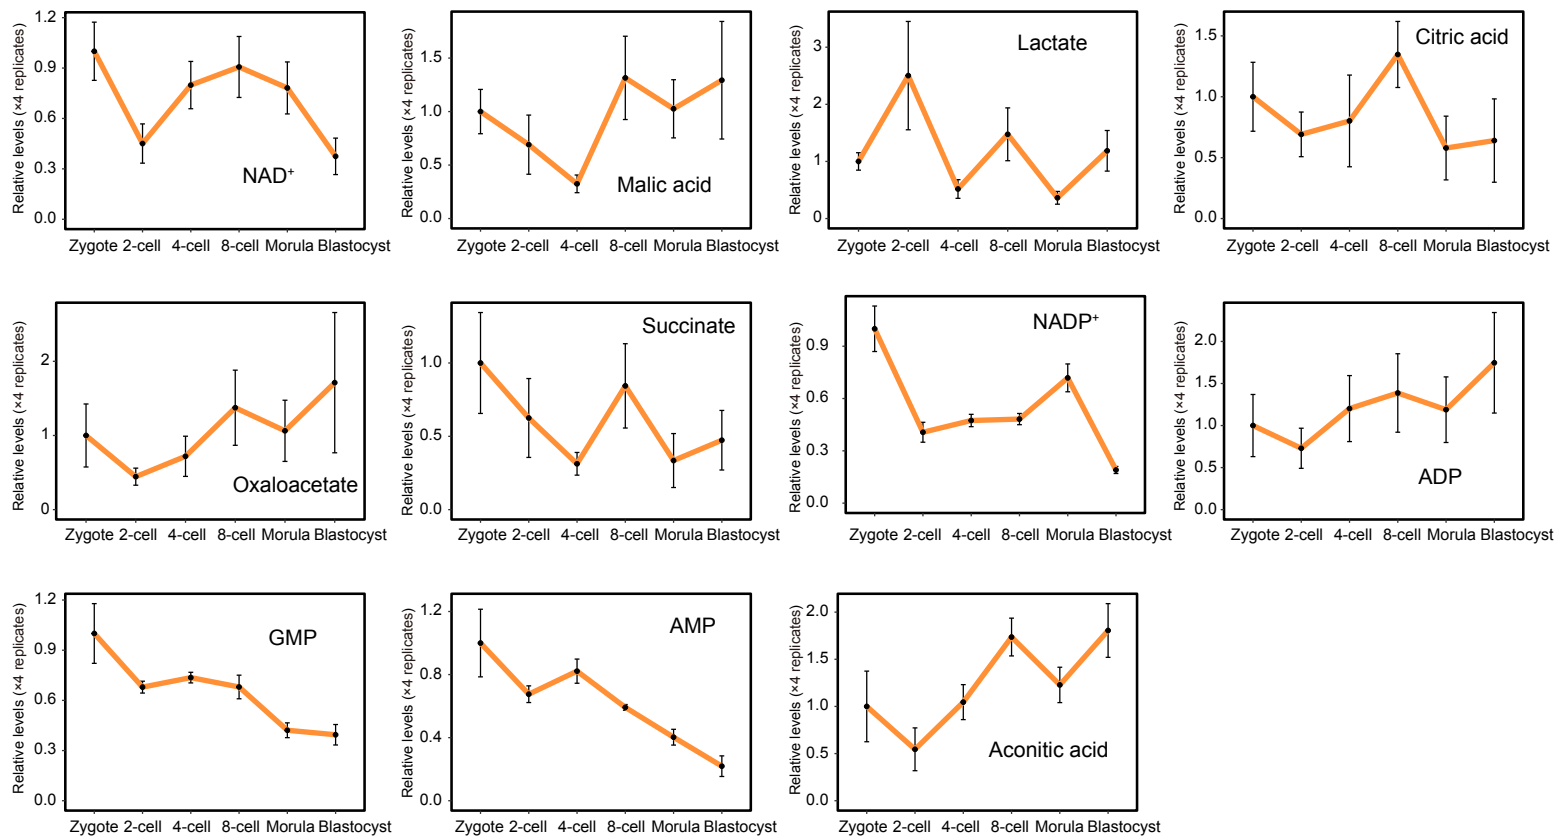

**b**

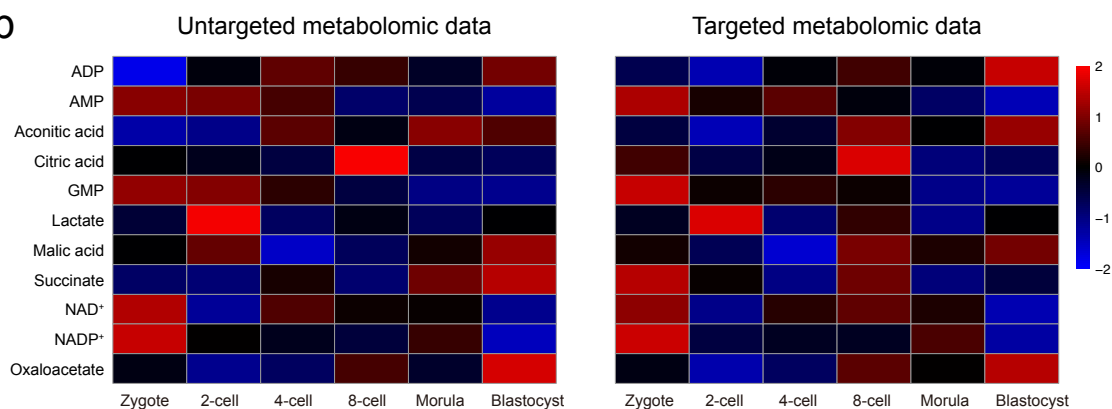

**c**

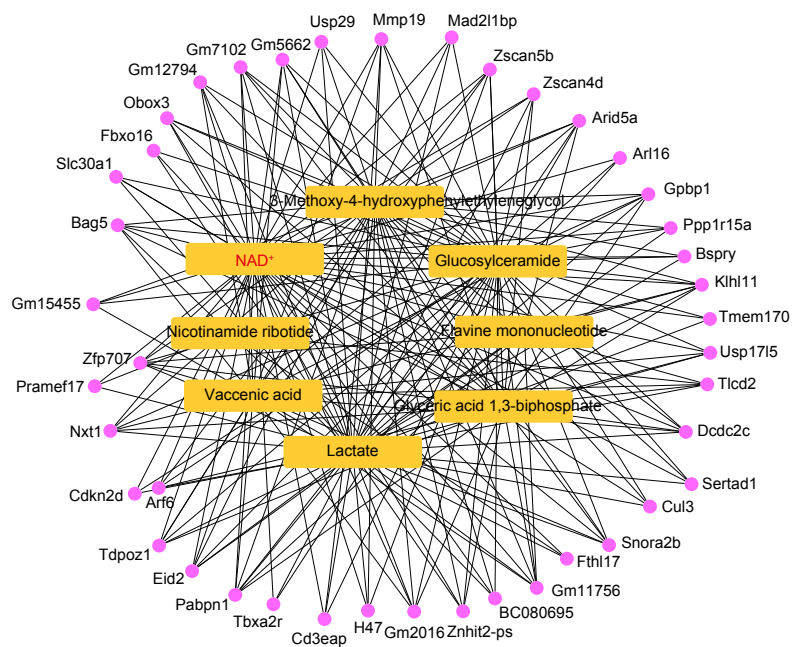

**Figure S1. Targeted metabolomic analysis.** **a** Relative level of 11 metabolites related to carbohydrate metabolism during mouse early embryo development based on targeted metabolomic data. **b** Heatmap showing comparison of untargeted and targeted metabolome data. **c** Network connections of metabolites (yellow) and genes (pink)

a

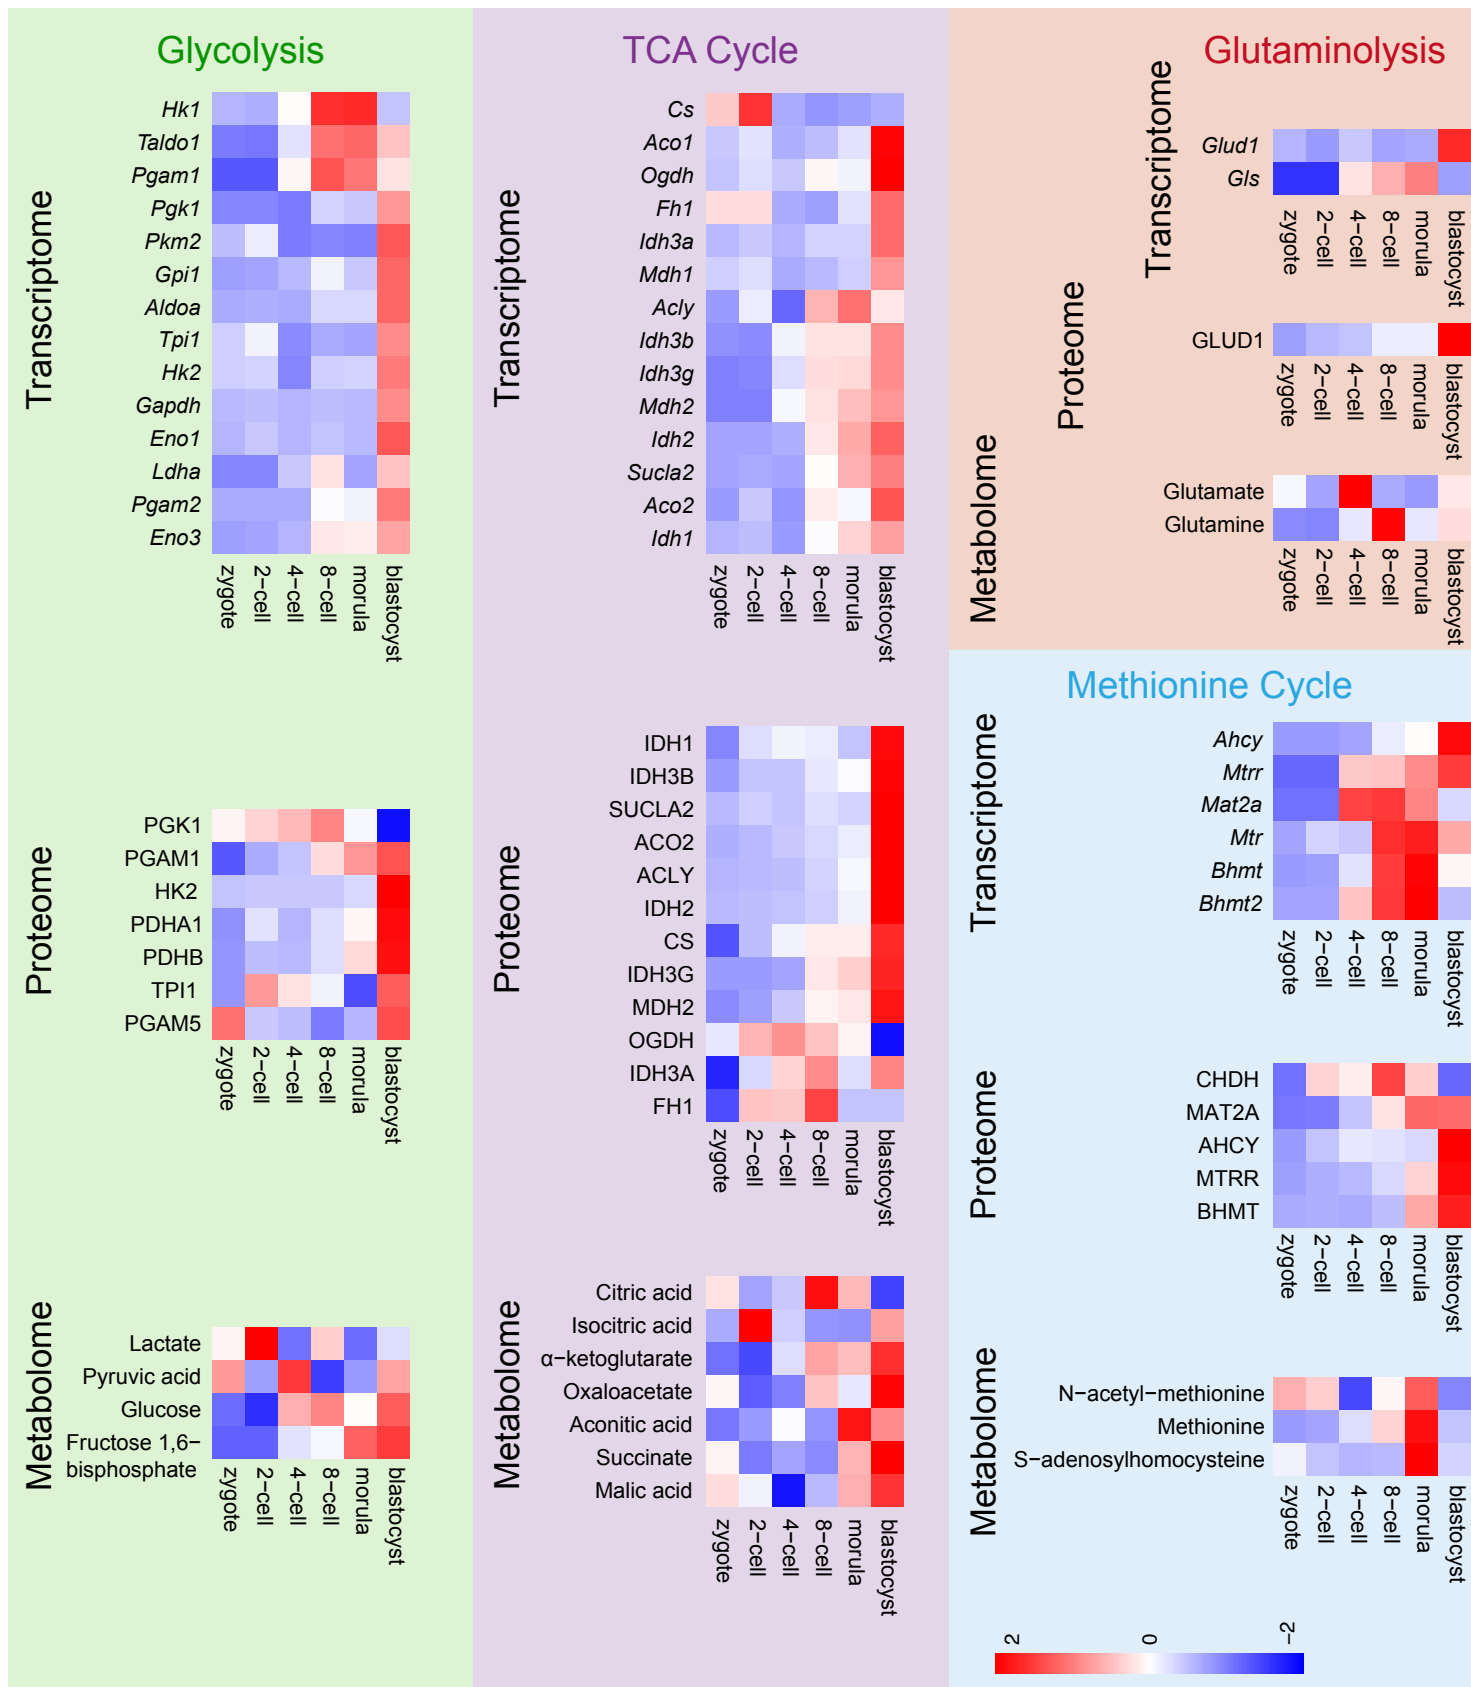

**Figure S2. Activities of metabolic pathways during mouse pre-implantation embryo development. a** Changes in metabolic enzyme levels during mouse pre-implantation development. Expression patterns of metabolic enzymes on RNA and protein according to transcriptomic and proteomic data on mouse early embryos.

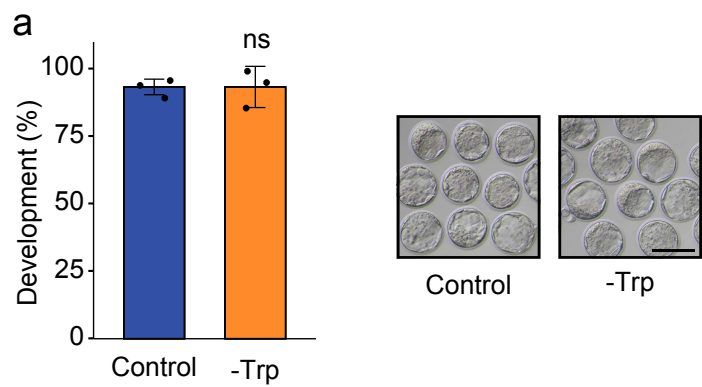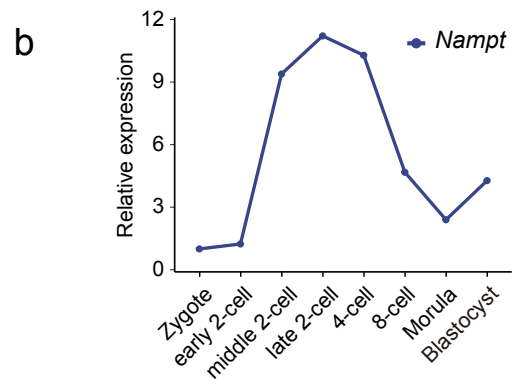

Expression level during preimplantation development (protein)

| Gene  | Zygote | 2-cell | 4-cell | 8-cell | Morula | Blastocyst |
|-------|--------|--------|--------|--------|--------|------------|
| NAMPT | 0.5781 | 0.7520 | 0.9063 | 1.0256 | 1.0508 | 1.6872     |

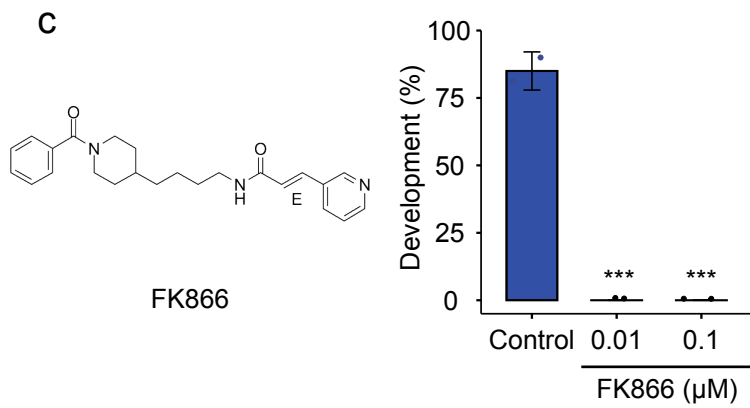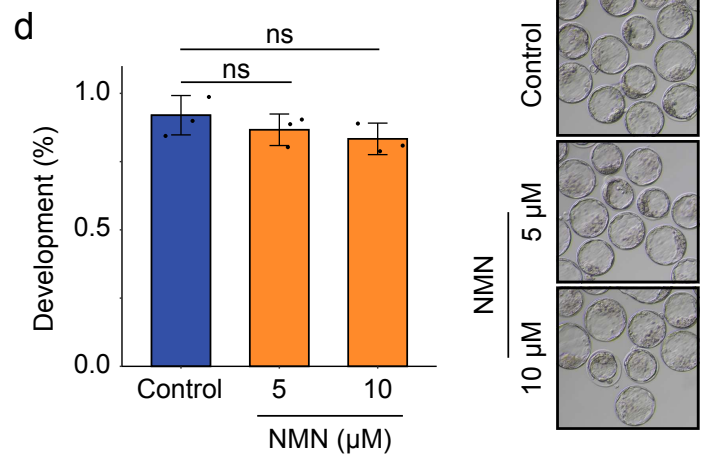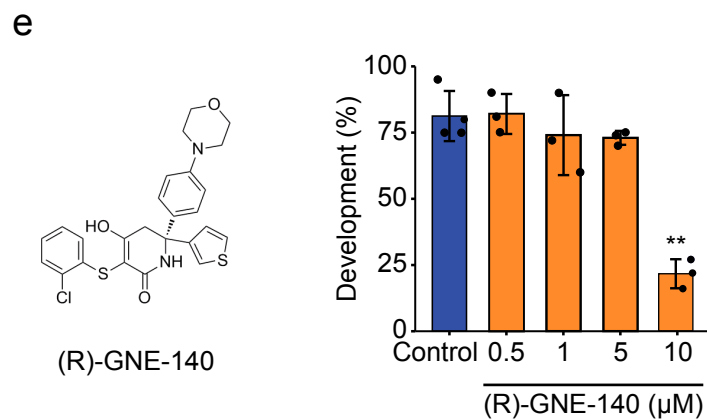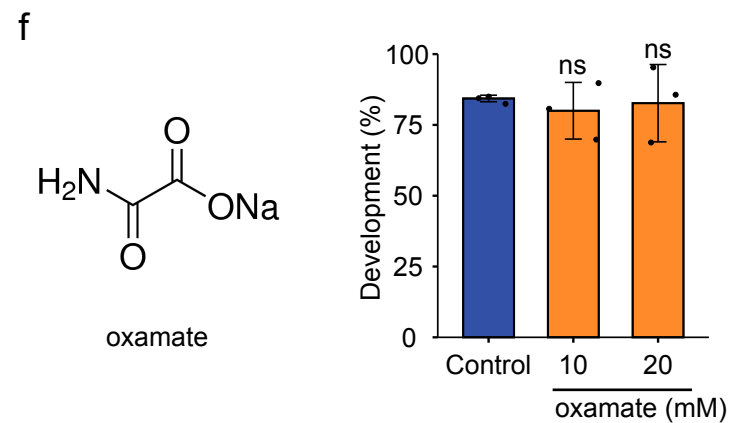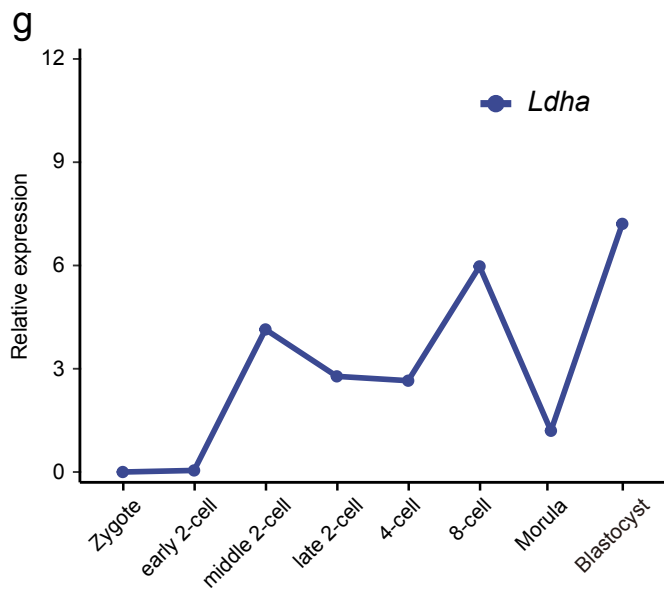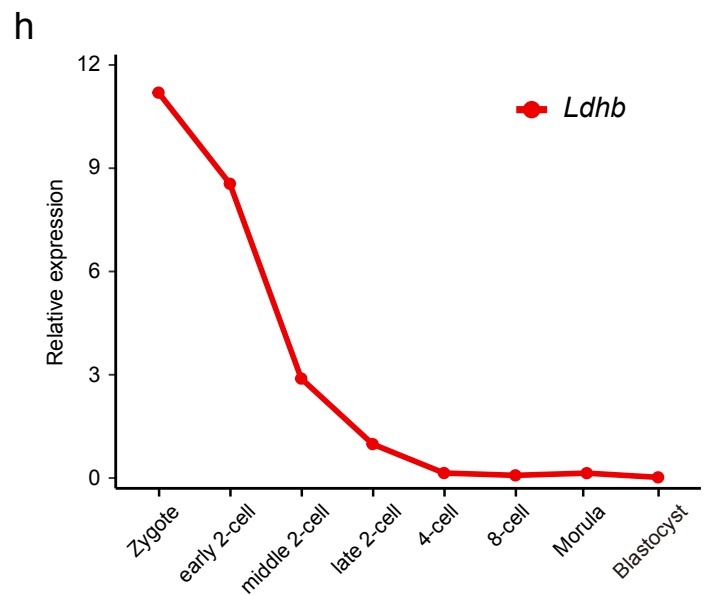

**Figure S3. Inhibition of NAD<sup>+</sup> synthesis impairs mouse early embryonic development.** **a**, Developmental rate of mouse embryos cultured in Trp-deprived medium. **b**, Expression patterns of *Nampt* at mRNA (upper) and protein (bottom) levels during mouse preimplantation embryonic development. **c**, Developmental rate of mouse embryos cultured in FK866-addition medium. **d**, Developmental rate of mouse embryos cultured in NMN-addition medium, 5  $\mu$ M and 10  $\mu$ M NMN were added into the KSOM medium. Neither concentrations could significantly affect the development of mouse embryos. Thus, the 10  $\mu$ M NMN was used in the rescue experiments. Developmental rate of mouse embryos cultured in GNE-140-addition medium (**e**) and oxamate-addition medium (**f**). Expression patterns of *Ldha* (**g**) and *Ldhb* (**h**) according to RNA-seq data on mouse early embryos.

a

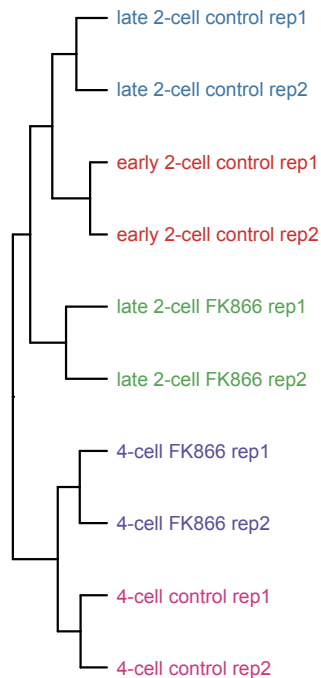

b

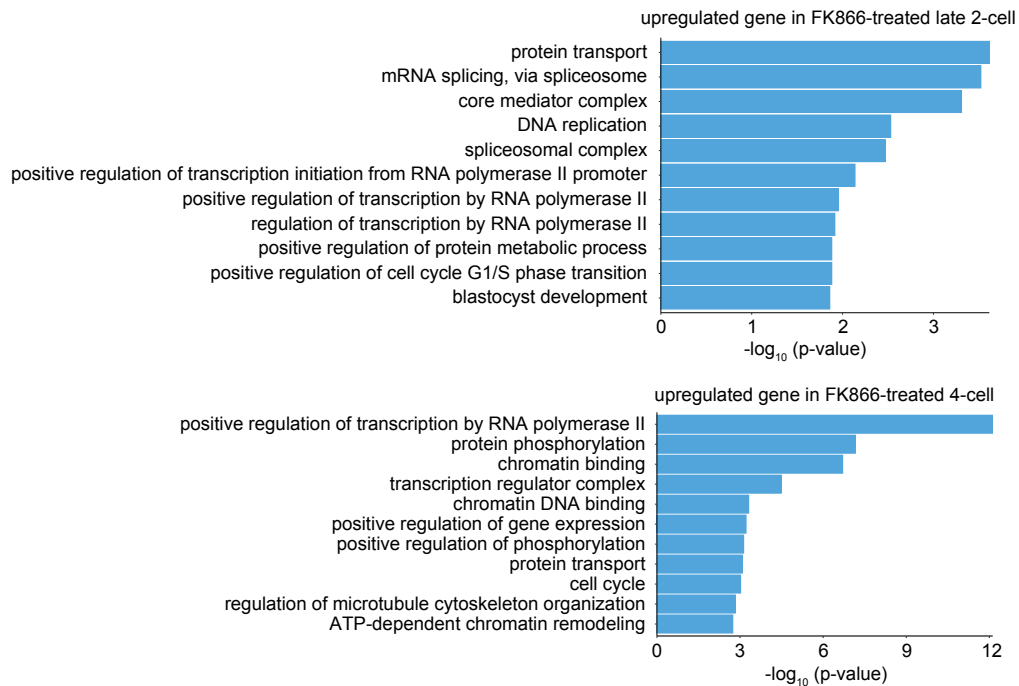

c

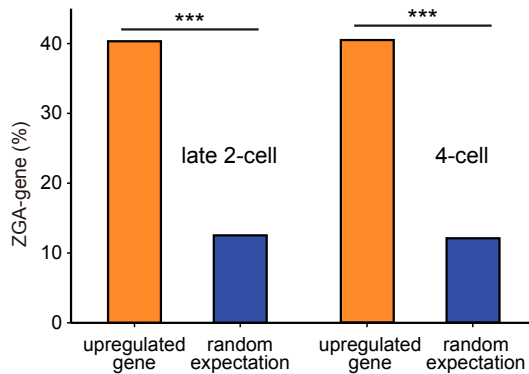

d

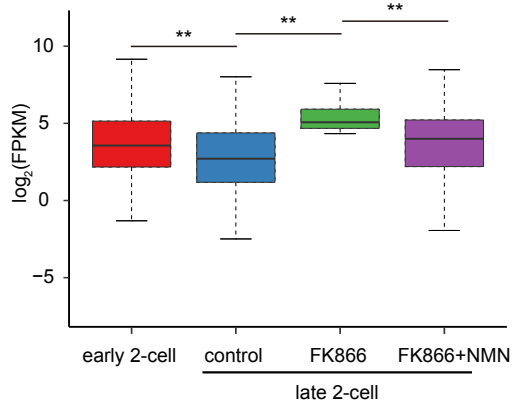

e

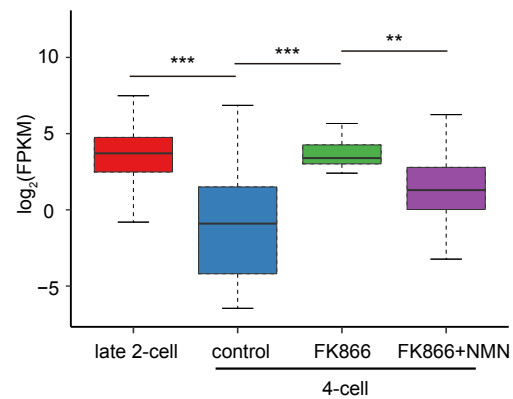



**Figure S4. RNA-seq analysis of control and FK866-treated mouse embryos. a** Unsupervised clustering of gene expression among control and FK866-treated embryos at the late 2- and 4-cell stages. **b** KEGG analysis of upregulated genes in FK866-treated late 2- and 4-cell embryos. **c** Bar plot showing the numbers of ZGA genes embedded within upregulated genes upon FK866 treatment, and those expected by chance in late 2- and 4-cell embryos. Box plots showing ZGA genes upregulated between control and FK866-treated embryos that were rescued by NMN supplementation in **(d)** late 2-cell and **(e)** 4-cell embryos, respectively.

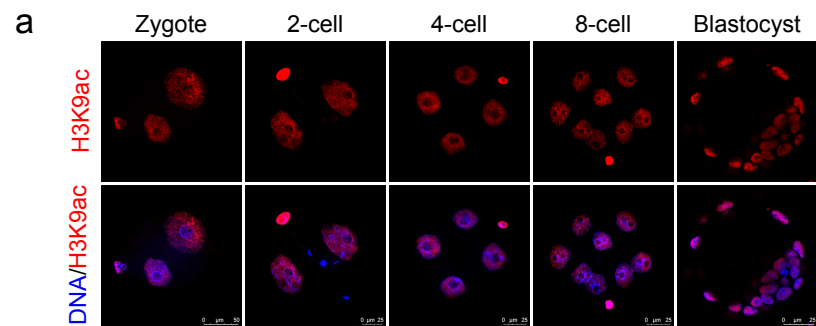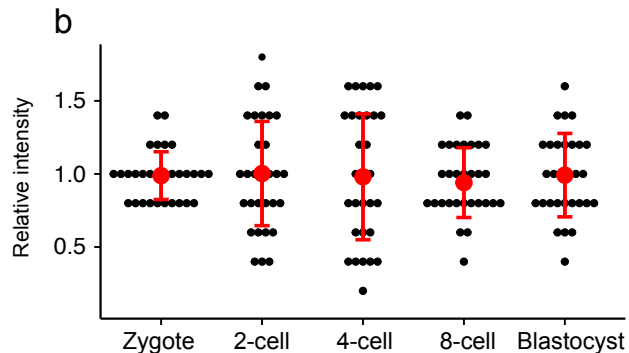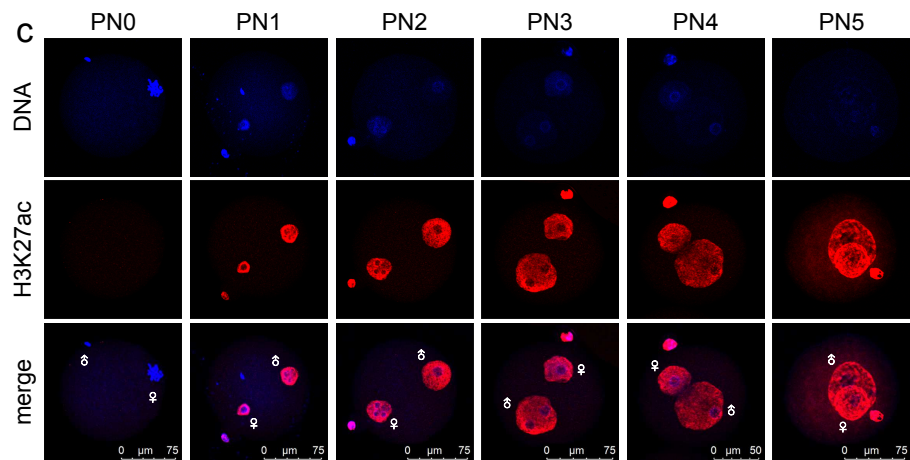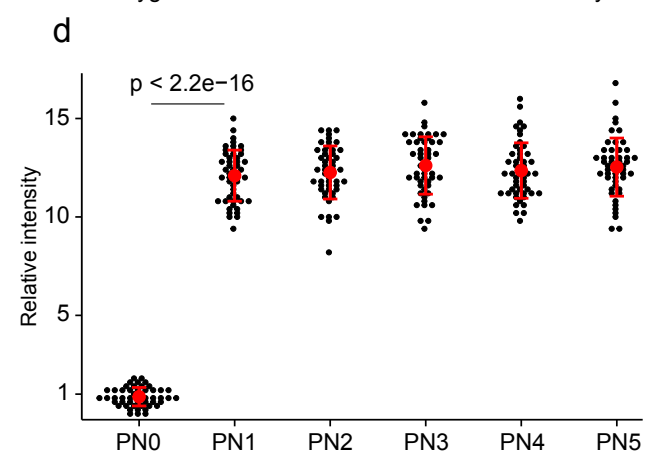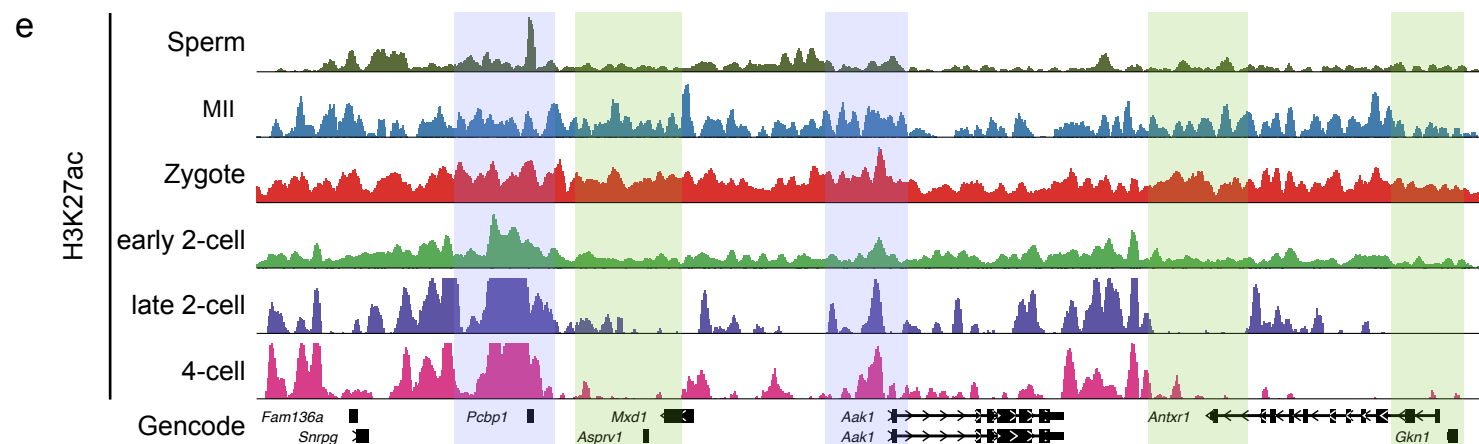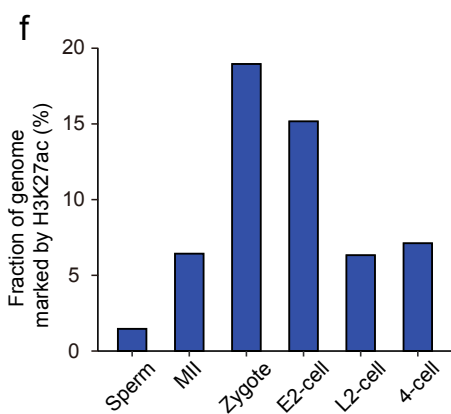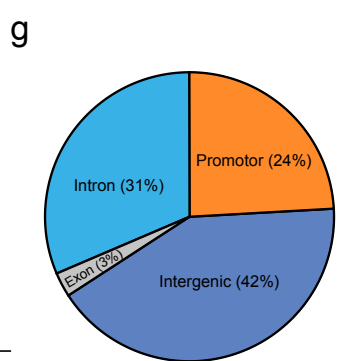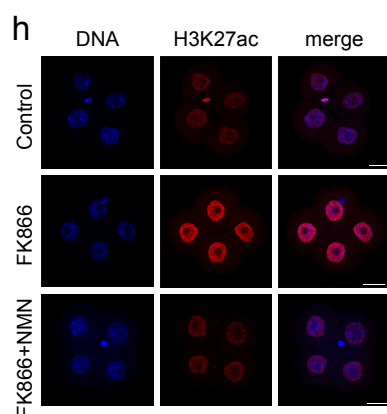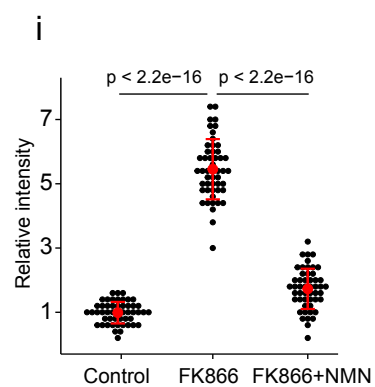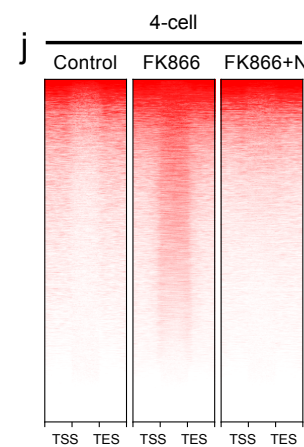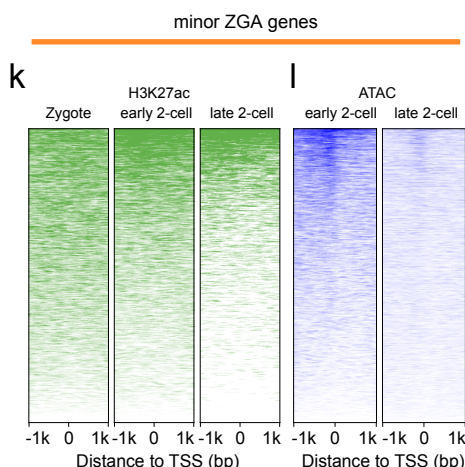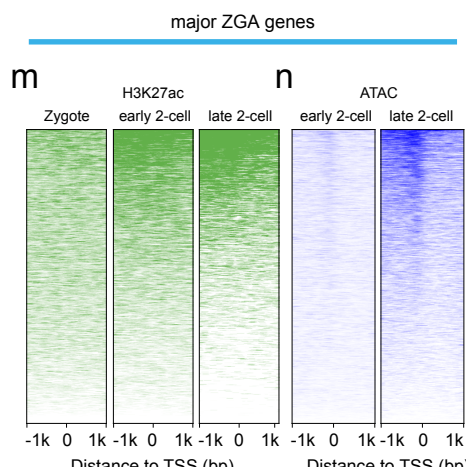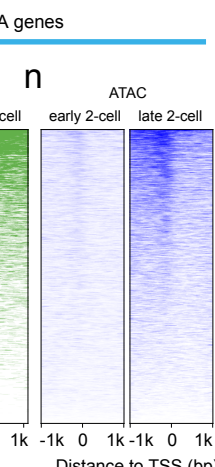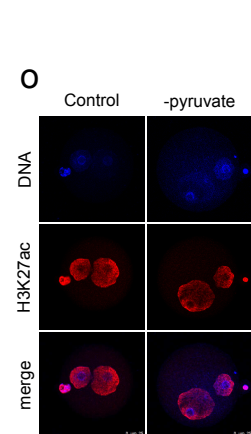

**Figure S5. Establishment of zyH3K27ac landscapes in early mouse embryos. a, b** Immunostaining of H3K9ac during mouse pre-implantation embryo development. Representative image from three independent experiments is shown. Scale bar, 25  $\mu\text{m}$ . Each dot represents a single nucleus. **c, d** Dynamics of H3K27ac enrichment across all pronuclear stages in the zygote. The H3K27ac fluorescence intensity of zygotes was quantified. Each dot represents a single nucleus. **e** Genome-wide landscapes of H3K27ac histone modification in mouse sperm, oocyte, zygote (PN4), early 2-cell, late 2-cell, and 4-cell embryos. **f** Fraction of the mouse genome covered by H3K27ac reads at different developmental stages. **g** Pie charts show the percentages of H3K27ac peaks assigned to the promoter, intron, exon, and intergenic regions. **h** Representative confocal images of control, FK866-treated, and FK866+NMN-treated 4-cell embryos stained with H3K27ac antibody. Scale bars, 25  $\mu\text{m}$ . **i** Quantification of H3K27ac fluorescence intensity in 4-cell embryos. Each dot represents a single nucleus. **j** Heatmap showing all H3K27ac signals ranked by their relative change after FK866 treatment. NMN rescued the changes induced by FK866 treatment in 4-cell embryos. Heatmap showing minor ZGA genes (**k**) and major ZGA genes (**m**) promoter H3K27ac signals in zygote, early 2-cell, and late 2-cell embryos. Heatmap showing minor ZGA genes (**l**) and major ZGA genes (**n**) promoter ATAC signals in early and late 2-cell embryos. **o** Representative confocal images of control and pyruvate-deprived zygotes stained with H3K27ac antibody. Scale bars, 25  $\mu\text{m}$ .

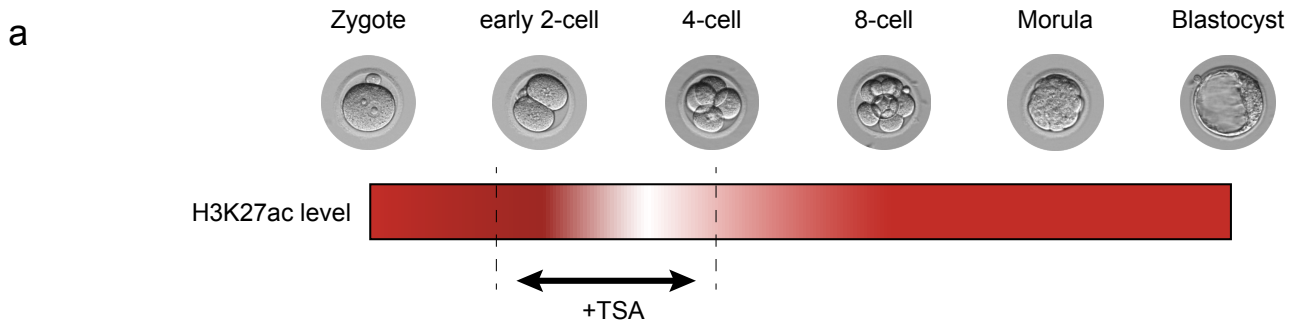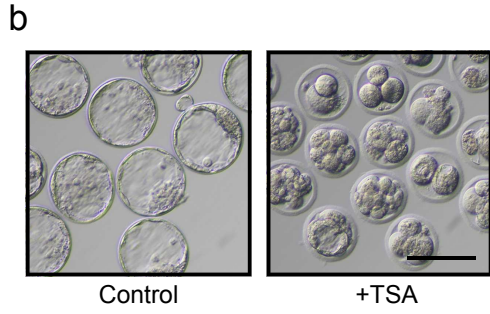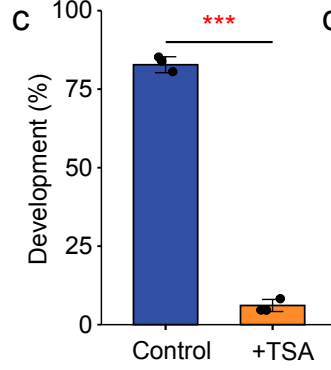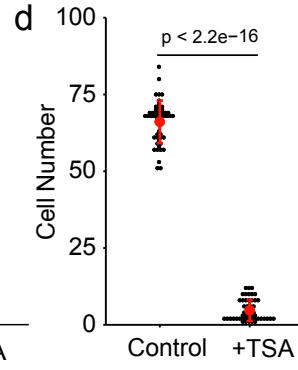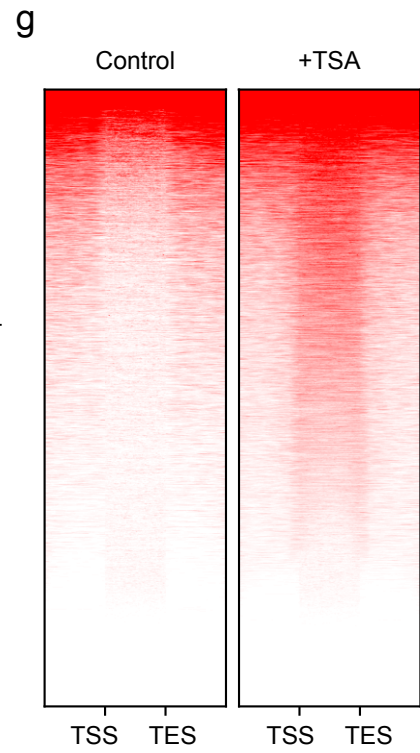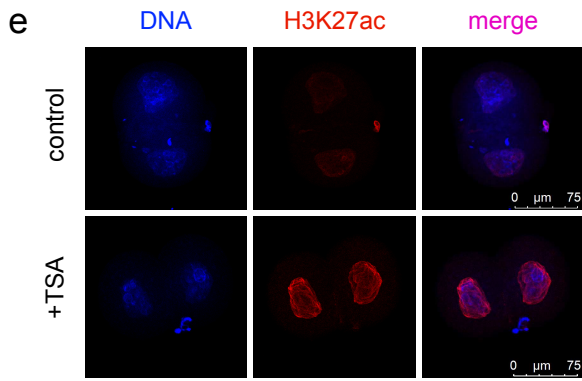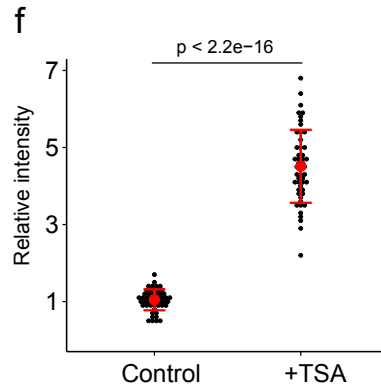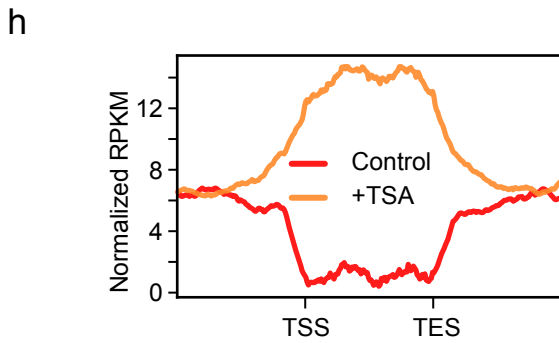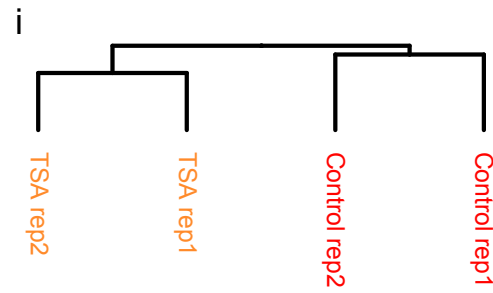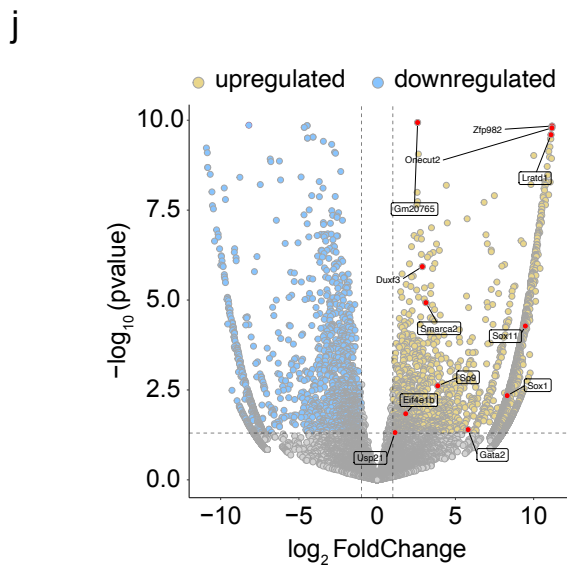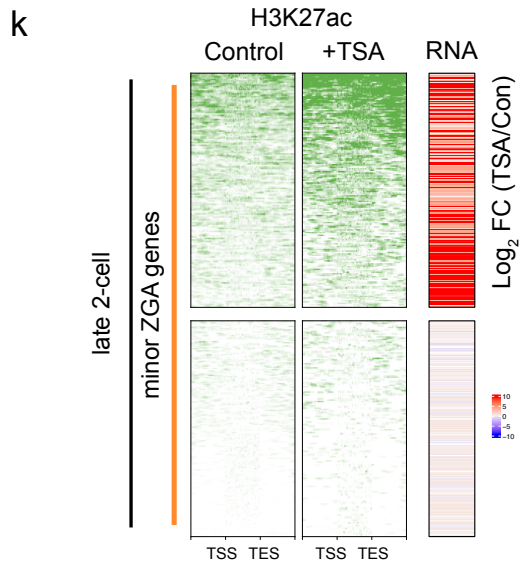

**Fig. S6 Failure of zyH3K27ac removal resulted in excessive minor ZGA.** **a** Schematic presentation of the experimental TSA treatment protocol. **b** Representative images and **(c)** developmental rates of control and TSA-treated embryos. Data are from three independent experiments. \*\*\* $P < 0.001$  (Student's t-test). Scale bars, 50  $\mu\text{m}$ . **d** Quantification of cells in control and TSA-treated embryos. Dots represent cell numbers in a single embryo. **e** Representative confocal images of control and TSA-treated embryos stained with H3K27ac antibody. Scale bars, 75  $\mu\text{m}$ . **f** Quantification of H3K27ac fluorescence intensity in control and TSA-treated embryos. Each dot represents a single nucleus. **g** Heatmap showing zyH3K27ac signals ranked by their relative change after TSA treatment. **h** Metaplot of H3K27ac signals ( $Z$ -score normalized) in control and TSA-treated late 2-cell embryos. **i** Unsupervised clustering of gene expression among control and TSA-treated embryos at the late 2-cell stage. **j** RNA-seq analysis results for control and TSA-treated late 2-cell mouse embryos. Volcano plots show gene expression changes. Yellow and blue dots indicate significantly upregulated (fold change  $> 1$ ) and downregulated (fold change  $< -1$ ) genes ( $P < 0.05$ ). **k** Heatmap (left) showing H3K27ac signals ranked by their relative changes after TSA treatment. Heatmap (right) shows that minor ZGA genes were upregulated between control and TSA-treated embryos. Mean values of two biological replicates were scaled and are represented as  $Z$  scores.

**a** Gene expression during preimplantation development (FPKM)

| Genes        | Zygote | early 2-cell | middle 2-cell | late 2-cell | 4-cell | 8-cell | Morula | Blastocyst |
|--------------|--------|--------------|---------------|-------------|--------|--------|--------|------------|
| <i>Sirt1</i> | 13.8   | 19.8         | 185.3         | 169.9       | 116.9  | 46.5   | 36.4   | 21.6       |
| <i>Sirt2</i> | 4.8    | 5.0          | 4.6           | 5.2         | 15.4   | 18.5   | 16.1   | 26.5       |
| <i>Sirt3</i> | 10.5   | 9.7          | 7.9           | 3.6         | 6.3    | 5.5    | 1.2    | 14.9       |
| <i>Sirt4</i> | 11.1   | 7.6          | 13.3          | 7.1         | 5.2    | 0.4    | 2.3    | 2.2        |
| <i>Sirt5</i> | 20.7   | 23.1         | 10.9          | 5.7         | 8.5    | 17.2   | 12.6   | 4.7        |
| <i>Sirt6</i> | 43.7   | 27.2         | 6.6           | 28.7        | 79.8   | 65.8   | 90.9   | 44.0       |
| <i>Sirt7</i> | 29.6   | 9.2          | 28.2          | 61.3        | 69.7   | 26.0   | 18.6   | 11.0       |

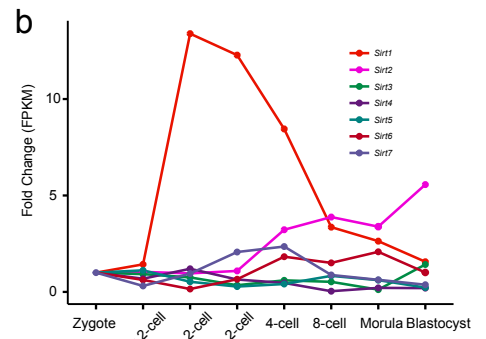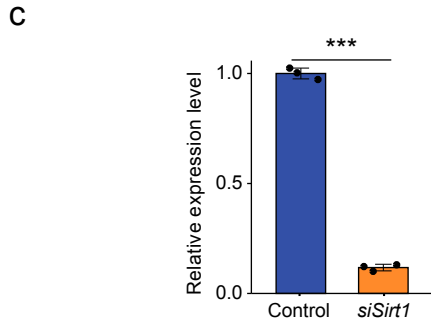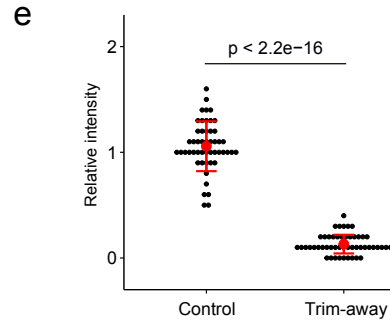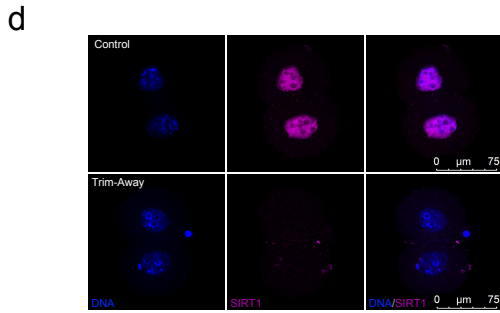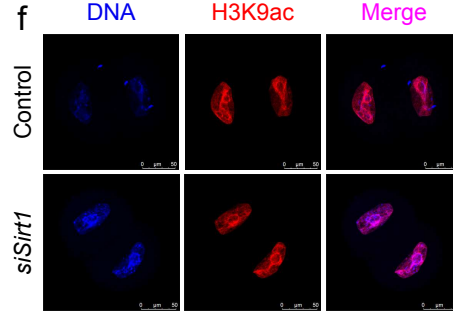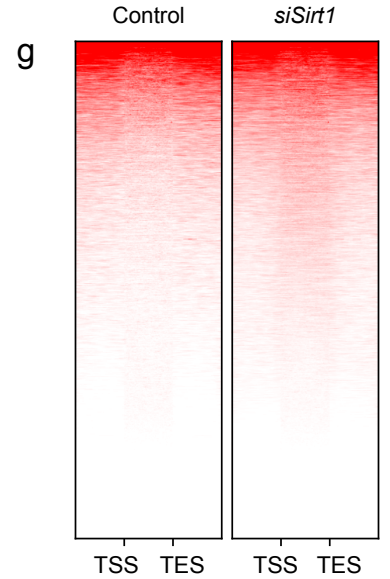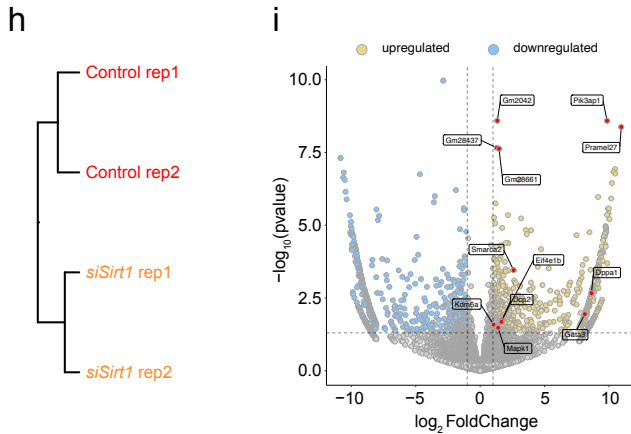

**k** Domain architecture comparison of SIRT1 between human and mouse

| Score                | Expect                                                                                                     | Method                       | Identities   | Positives    | Gaps       | Frame |
|----------------------|------------------------------------------------------------------------------------------------------------|------------------------------|--------------|--------------|------------|-------|
| 1148 bits(2970) 0.00 |                                                                                                            | Compositional matrix adjust. | 632/748(84%) | 671/748(89%) | 12/748(1%) |       |
| Human 1              | MADEAALALQPGGSPAAGDREAASSPAGEFLRKRPRRDGPGFLERSPGEPGGAAPEREV                                                |                              |              |              |            | 60    |
| Mouse 1              | MADEVALLAQAGS-PSAAAAMEAASQPADEFLRKRPRRDGPGFLGRSPGEPSSAAVAPAAA                                              |                              |              |              |            | 59    |
| Human 61             | PAAARGCPGAAAAALWREAEAEAAAAGGQEAQATAAAGEGDNPGPLQGPSPREPLADNL                                                |                              |              |              |            | 120   |
| Mouse 60             | A AA AALWREA AA+A E+EA ATA AG+GDNG GL+ REP AD+ GCEAAS--AAPAALWREAAGAAASA--EREAPATAVAGDGDNGSGLR---REPRAAADF |                              |              |              |            | 112   |
| Human 121            | YDEDDDDGEEEEAAAAAIGYRDNLPLFGDEIITNGFHSCESEEDRASHASSSDWTFRP                                                 |                              |              |              |            | 180   |
| Mouse 113            | DDDEGEEDEEAAAAAIAIGYRDNLPLDGLLITNGFHSCESEDDDRSHASSSDWTFRP                                                  |                              |              |              |            | 172   |
| Human 181            | RIGPYTFVQOHLMICTDPRITLKDLPETIPPELDDMTLWQIVINILSEPPKRRKRDI                                                  |                              |              |              |            | 240   |
| Mouse 173            | RIGPYTFVQOHLMICTDPRITLKDLPETIPPELDDMTLWQIVINILSEPPKRRKRDI                                                  |                              |              |              |            | 232   |
| Human 241            | NTIEDAVKLLQECKKIIVLTGAGVSVSCGIPDFRSRDGIYARLAVDFPDLPPQAMFDIE                                                |                              |              |              |            | 300   |
| Mouse 233            | NTIEDAVKLLQECKKIIVLTGAGVSVSCGIPDFRSRDGIYARLAVDFPDLPPQAMFDIE                                                |                              |              |              |            | 292   |
| Human 301            | YFRKDRPFRFFFAKEIYPGQFQPSLCHKFIALSDKEGKLLRNVTQNIIDTLEQVAGIQRIL                                              |                              |              |              |            | 360   |
| Mouse 293            | YFRKDRPFRFFFAKEIYPGQFQPSLCHKFIALSDKEGKLLRNVTQNIIDTLEQVAGIQRIL                                              |                              |              |              |            | 352   |
| Human 361            | QCHGSFATASCLICKYKVDCEAVRGDIFNQVPRCPRCPADEPLAIMKPEIVFFGENLPE                                                |                              |              |              |            | 420   |
| Mouse 353            | QCHGSFATASCLICKYKVDCEAVRGDIFNQVPRCPRCPADEPLAIMKPEIVFFGENLPE                                                |                              |              |              |            | 412   |
| Human 421            | QFHRAMKYDKDEVLLIVIGSSLKVRPVALIPSSIPHEVQIILNREPLPHLHFDFVLLG                                                 |                              |              |              |            | 480   |
| Mouse 413            | QFHRAMKYDKDEVLLIVIGSSLKVRPVALIPSSIPHEVQIILNREPLPHLHFDFVLLG                                                 |                              |              |              |            | 472   |
| Human 481            | DCDVIINELCHRLGGYAKLCCNPVKLSEITEKPPRTOKELAYLSELPPTLPHVSDSSS                                                 |                              |              |              |            | 540   |
| Mouse 473            | DCDVIINELCHRLGGYAKLCCNPVKLSEITEKPPRTOKELAYLSELPPTLPHVSDSSS                                                 |                              |              |              |            | 532   |
| Human 541            | PERTSPDSSVITLDDQAASN-DDLVVSESKGMEKPEQVOTSRNVESIAEQENPD                                                     |                              |              |              |            | 599   |
| Mouse 533            | PERTP DSSVI TL+DQA +N +DL+VSES C+EKKPEQVOTSRNVE+I +ENPD                                                    |                              |              |              |            | 589   |
| Human 600            | LKNVGSSTGEKNERTSVAGTVRKCWPNRVAKEQISRRLDGNOYLFPPNRYIFHGAEVYS                                                |                              |              |              |            | 659   |
| Mouse 590            | K VGSST +KNERTSVA TVRKCWPNR+AKEQIS+RL+GNQYLF+PPNRYIFHGAEVYS                                                |                              |              |              |            | 649   |
| Human 660            | DSEDDVLSSSSCGNSDSGTCQSPSLEEFMEDESEIEEFYNGLEDEPDPVPERAGGAGPFT                                               |                              |              |              |            | 719   |
| Mouse 650            | DSEDDVLSSSSCGNSDSGTCQSPSLEEFMEDESEIEEFYNGLEDDTERPECAGSGFGA                                                 |                              |              |              |            | 709   |
| Human 720            | DGDDQEAINEAISVKQEVTDNMPYNSKS                                                                               |                              | 747          |              |            |       |
| Mouse 710            | DGGDQEVVNEAIATRQELTDNMPYNSKKS                                                                              |                              | 737          |              |            |       |

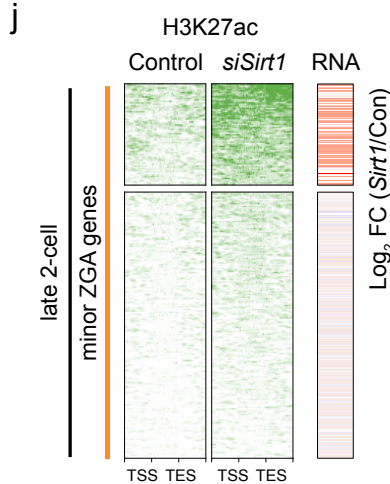

**Figure S7. Effect of *Sirt1* knockdown on zyH3K27ac removal.** **a, b** Sirtuin family expression patterns according to RNA-seq data in early mouse embryos. Results of **(c)** qPCR and **(d)** immunofluorescence analysis of late 2-cell *Sirt1* knockdown embryos, validating the *Sirt1* knockdown efficiency results. **e** Quantification of SIRT1 the fluorescence intensity of control and *Sirt1* knockdown in late 2-cell embryos. Each dot represents a single nucleus. **f** Representative confocal images of control and *Sirt1*-knockdown embryos stained with H3K9ac antibody. Scale bars, 50  $\mu$ m. **g** Heatmap showing zyH3K27ac signals ranked by their relative change after *Sirt1* knockdown in late 2-cell embryos. **h** Unsupervised clustering of gene expression among control and *Sirt1* knockdown embryos at the late 2-cell stage. **i** RNA-seq analysis results for control and *Sirt1* knockdown in late 2-cell mouse embryos. Volcano plots show gene expression changes. Yellow and blue dots indicate significantly upregulated (fold change  $> 1$ ) and downregulated (fold change  $< -1$ ) genes ( $P < 0.05$ ). **j** Heatmap (left) showing H3K27ac signals ranked by their relative change after *Sirt1* knockdown. Heatmap (right) shows that minor ZGA genes were upregulated between control and *Sirt1*-knockdown embryos. Mean values of two biological replicates were scaled and are represented as Z scores. **k** SIRT1 proteins are conserved between human and mouse, yellow boxes indicate functional domains.
